# Supplementary material
Source: PubMed Central journal article supplement (PMC3101633)
Supplement: NIHMS282205-supplement-1.pdf [file NIHMS282205-supplement-1.pdf]

## Supplemental Material

### Method

#### Genotyping

##### *Cardiovascular Gene-Centric 50K SNP Array in INVEST-GENES Case-control*

We obtained genotype data for 153 SNPs in the Chromosome 9p21 region (position 21900000- 22200000, as defined by Samani et al.<sup>1</sup>) on INVEST-GENES case-control samples (n = 1,460) from the gene-centric Human CVD 50K SNP array (Illumina), a custom chip with approximately 49,094 SNPs from ~2,100 loci related to cardiovascular, inflammatory and metabolic phenotypes with most loci captured at a density equal or greater than that afforded by genome-wide genotyping products (hereafter referred to as the CVD SNP array).<sup>2</sup>

Quality control (QC) procedures were performed using GenomeStudio software (Illumina Inc. San Diego, CA). The QC criteria were determined *a priori* as: GenTrain clustering algorithm score of > 0.3; SNP call rate > 95%; sample call rate > 90%; minor allele frequency of > 0.01; Hardy Weinberg Equilibrium p value within race/ethnicity >10<sup>-5</sup>.

##### *Genotyping for rs2383207 and rs10757278 in INVEST-GENES cohort*

Since the risk allele we observed was opposite from the literature in this cohort based on the CVD SNP array data, we sought to independently genotype 2 additional SNPs that have been commonly published to confirm that we found the same directional

findings. Two of the 9p21 SNPs: rs2383207 and rs10757278 (in high LD ( $r^2 > 0.8$ ) with rs1333049, rs10757274 and rs2891168 in Caucasians), were either not on the CVD SNP array or did not pass the CVD SNP array QC procedure (deviated from Hardy Weinberg Equilibrium in African Americans). We therefore genotyped these 2 SNPs in the entire INVEST-GENES cohort of 5,979. DNA samples from INVEST-GENES cohort were genotyped for these 2 variants using TaqMan allelic discrimination (Applied Biosystems, Foster City, CA) at University of Florida (INVEST-GENES). The PCR primers and probes for these 2 SNPs (rs2383207, Assay ID C\_\_15789010\_10, and rs10757278, Assay ID C\_\_11841860) were purchased from Applied Biosystems. Genotype accuracy was verified by genotyping 5-10% randomly selected duplicate samples for each SNP and 36 samples (12 random samples for each genotype for each SNP) were also genotyped by pyrosequencing<sup>3</sup> (Biotage, Uppsala, Sweden) using a PSQ HS96A SNP reagent kit (Biotage AB, Uppsala, Sweden) to confirm genotyping results from TaqMan (primers available upon request).

*Genotyping for rs2383207, rs10757278, rs7049105, rs2157719 in INFORM*

To replicate the findings in INVEST, DNA samples from INFORM were genotyped for 4 SNPs: rs2383207, 10757278, rs7049105 and rs2157719, using TaqMan allelic discrimination (Applied Biosystems, Foster City, CA) or pyrosequencing at Washington University. The PCR primers and probes for the first 2 SNPs (rs2383207, Assay ID C\_\_15789010\_10, and rs10757278, Assay ID C\_\_11841860) were purchased from Applied Biosystems. Genotyping of rs7049105 and 2157719 were performed by pyrosequencing<sup>3</sup> (Biotage, Uppsala, Sweden) using a PSQ HS96A SNP reagent kit (Biotage AB, Uppsala, Sweden) (primers available upon request).

**Table S1: Baseline demographics and medical history of INVEST participants**

|                                    | INVEST Case Control (n = 1460) |                 |                             |                  |                     |                 | INVEST Cohort (n=5907) |                 |                             |                  |                      |                   |
|------------------------------------|--------------------------------|-----------------|-----------------------------|------------------|---------------------|-----------------|------------------------|-----------------|-----------------------------|------------------|----------------------|-------------------|
|                                    | Caucasians (n=858)             |                 | African Americans (n = 212) |                  | Hispanics (n = 390) |                 | Caucasians (n = 2364)  |                 | African Americans (n = 736) |                  | Hispanics (n = 2770) |                   |
|                                    | case (n=178)                   | control (n=680) | case (n=43)                 | control (n= 169) | case (n=77)         | control (n=313) | Event (n=178)          | No event (2186) | Event (n=43)                | No event (n=693) | Event (n=77)         | No Event (n=2693) |
| <b>Demographic</b>                 |                                |                 |                             |                  |                     |                 |                        |                 |                             |                  |                      |                   |
| Age, year, mean (SD)               | 71.4 (9.5)                     | 70.6 (9.1)      | 68.8 (11.9)                 | 68.3 (9.4)       | 72.8 (9.0)          | 71.2 (8.9)      | 71.4 (9.5)             | 68.2 (9.4)      | 68.8 (11.9)                 | 63.0 (9.4)       | 72.8 (9.0)           | 64.7 (9.5)        |
| sex, % male                        | 92 (51.7%)                     | 363 (53.4%)     | 19 (44.2%)                  | 70 (41.2%)       | 39 (50.7%)          | 130 (41.5%)     | 92 (51.7%)             | 1223 (56.0%)    | 19 (44.2%)                  | 256 (36.9%)      | 39 (50.7%)           | 954 (35.4%)       |
| Body Mass Index, kg/m <sup>2</sup> | 27.3 (5.2)                     | 28.8 (5.3)      | 28.6 (4.5)                  | 31.0 (6.2)       | 27.7 (4.3)          | 28.0 (4.9)      | 27.3 (5.2)             | 29.2 (5.5)      | 28.6 (4.5)                  | 31.7 (6.4)       | 27.7 (4.3)           | 29.2 (5.3)        |
| Baseline SBP (mmHg)                | 151.3 (18.2)                   | 148.4 (17.5)    | 153.9 (17.5)                | 149.0 (20.2)     | 146.8 (19.7)        | 147.2 (18.7)    | 151.3 (18.2)           | 148.7 (18.1)    | 153.9 (17.5)                | 149.2 (19.0)     | 146.8 (19.7)         | 146.8 (18.4)      |
| Baseline DBP (mmHg)                | 81.8 (10.5)                    | 82.3 (10.5)     | 88.0 (11.1)                 | 86.1 (9.2)       | 83.8 (11.1)         | 85.0 (9.7)      | 81.8 (10.5)            | 83.1 (10.8)     | 88.0 (11.1)                 | 88.2 (10.7)      | 83.8 (11.1)          | 86.9 (10.1)       |
| Baseline Heart Rate (1/min)        | 76.0 (9.1)                     | 75.1 (9.3)      | 76.3 (8.6)                  | 76.3 (9.7)       | 76.0 (9.3)          | 73.0 (9.1)      | 76.0 (9.1)             | 74.9 (9.4)      | 76.3 (8.6)                  | 76.8 (9.5)       | 76.0 (9.3)           | 74.1 (9.9)        |
| <b>Medical History, No. (%)</b>    |                                |                 |                             |                  |                     |                 |                        |                 |                             |                  |                      |                   |
| History of MI                      | 69 (38.8%)                     | 226 (33.2%)     | 16 (37.2%)                  | 37 (21.8%)       | 17 (22.1%)          | 27 (8.6%)       | 69 (38.8%)             | 865 (40.0%)     | 16 (37.2%)                  | 146 (21.1%)      | 17 (22.1%)           | 237 (8.8%)        |
| Heart Failure (NYHA class I-III)   | 20 (11.2%)                     | 34 (5.0%)       | 5 (11.6%)                   | 12 (7.1%)        | 8 (10.4%)           | 7 (2.2%)        | 20 (11.2%)             | 102 (4.7%)      | 5 (11.6%)                   | 31 (4.5%)        | 8 (10.4%)            | 35 (1.3%)         |
| Chronic stable angina              | 98 (55.1%)                     | 326 (47.9%)     | 26 (60.5%)                  | 134 (78.8%)      | 64 (83.1%)          | 302 (96.5%)     | 98 (55.1%)             | 1082 (49.5%)    | 26 (60.5%)                  | 546 (78.8%)      | 64 (83.1%)           | 2560 (95.1%)      |
| Unstable angina                    | 32 (18.0%)                     | 100 (14.7%)     | 5 (11.6%)                   | 22 (12.9%)       | 9 (11.7%)           | 17 (5.4%)       | 32 (18.0%)             | 320 (14.6%)     | 5 (11.6%)                   | 106 (15.3%)      | 9 (11.7%)            | 109 (4.1%)        |
| Diabetes*                          | 53 (30.0%)                     | 122 (17.9%)     | 26 (60.5%)                  | 51 (30.0%)       | 34 (44.2%)          | 52 (16.6%)      | 53 (30.0%)             | 526 (24.1%)     | 26 (60.5%)                  | 233 (33.6%)      | 34 (44.2%)           | 789 (29.3%)       |

\*History of and/or currently taking anti-diabetic medications; Abbreviations: SD: standard deviation; SBP: systolic blood pressure; DBP: diastolic blood pressure; MI: myocardial infarction;

**Table S2. Baseline demographics and medical history of INFORM participants**

|                                    | INFORM (n=714)      |                     |                             |                     |
|------------------------------------|---------------------|---------------------|-----------------------------|---------------------|
|                                    | Caucasians (n =573) |                     | African Americans (n = 141) |                     |
|                                    | Event<br>(n=142)    | No Event<br>(n=431) | Event<br>(n=35)             | No Event<br>(n=106) |
| <b>Demographic</b>                 |                     |                     |                             |                     |
| Age, year, mean (SD)               | 63.6 (12.8)         | 61.5 (12.4)         | 55.6 (9.9)                  | 53.4 (10.6)         |
| sex, % male                        | 83 (58.5%)          | 289 (67.1%)         | 16 (45.7%)                  | 61 (57.6%)          |
| Body Mass Index, kg/m <sup>2</sup> | 29.5 (5.6)          | 29.4 (5.9)          | 31.0 (7.6)                  | 31.0 (8.1)          |
| Baseline SBP (mmHg)                | 132.8 (23.7)        | 135.0 (24.8)        | 150.0 (37.2)                | 146.5 (29.1)        |
| Baseline DBP (mmHg)                | 71.4 (14.6)         | 72.7 (14.9)         | 80.3 (19.8)                 | 83.0 (20.0)         |
| Baseline Heart Rate (1/min)        | 78.7 (18.0)         | 76.2 (18.2)         | 86.2 (23.1)                 | 81.5 (19.7)         |
| ACS type, No. (%)                  |                     |                     |                             |                     |
| ST-elevation MI                    | 35 (24.7%)          | 141 (32.7%)         | 7 (20.0%)                   | 16 (15.1%)          |
| Non-ST elevation MI                | 44 (31.0%)          | 138 (32.0%)         | 11 (31.4%)                  | 23 (21.7%)          |
| Unstable angina                    | 62 (43.7%)          | 151 (35.0%)         | 17 (48.6%)                  | 67 (63.2%)          |
| Old LBBB/Unknown                   | 1 (0.7%)            | 1 (0.2%)            |                             |                     |
| <b>Medical History, No. (%)</b>    |                     |                     |                             |                     |
| History of MI                      | 114 (80.3%)         | 348 (80.7%)         | 21 (60.0%)                  | 68 (64.2%)          |
| Heart Failure (NYHA class I-III)   | 9 (6.3%)            | 22 (5.1%)           | 4 (11.4%)                   | 20 (18.9%)          |
| Chronic stable angina              | n/a                 | n/a                 | n/a                         | n/a                 |
| Unstable angina                    | n/a                 | n/a                 | n/a                         | n/a                 |
| Diabetes*                          | 53 (37.3%)          | 85 (19.7%)          | 20 (57.1%)                  | 40 (37.7%)          |

\*History of and/or currently taking anti-diabetic medications; Abbreviations: SD: standard deviation; SBP: systolic blood pressure; DBP: diastolic blood pressure; MI: myocardial infarction; LBBB: left bundle branch block

**Table S3. Genotype and Allele frequencies of 9p21 SNPs in the INVEST-GENES and INFORM**

|            |                   | INVEST GENES |                         |                  |       | INFORM |                       |                  |          |
|------------|-------------------|--------------|-------------------------|------------------|-------|--------|-----------------------|------------------|----------|
|            | Race/Ethnicity    | N            | Genotype: n             | Allele frequency | HWE p | N      | Genotype: n           | Allele frequency | HWE p    |
| rs2383207  | Caucasians        | 2307         | AA/AG/GG: 444/1170/693  | A: 45%           | 0.21  | 530    | AA/AG/GG: 111/249/170 | A: 44%           | 0.26     |
|            | African Americans | 715          | AA/AG/GG: 13/153/549    | A: 13%           | 0.54  | 121    | AA/AG/GG: 13/15/93    | A: 17%           | <0.0001* |
|            | Hispanics         | 2717         | AA/AG/GG: 269/1182/1266 | A: 32%           | 0.78  |        |                       |                  |          |
| rs10757278 | Caucasians        | 2297         | AA/AG/GG: 588/1142/567  | A: 50.5%         | 0.79  | 530    | AA/AG/GG: 119/259/152 | A: 47%           | 0.66     |
|            | African Americans | 718          | AA/AG/GG: 461/214/43    | A: 79%           | 0.008 | 121    | AA/AG/GG: 69/46/6     | A: 76%           | 0.64     |
|            | Hispanics         | 2721         | AA/AG/GG: 787/1320/614  | A: 53.2%         | 0.18  |        |                       |                  |          |
| rs7049105  | Caucasians        | 858          | AA/AG/GG: 217/409/232   | A: 49%           | 0.17  | 526    | AA/AG/GG: 121/261/144 | A: 48%           | 0.9      |
|            | African Americans | 211          | AA/AG/GG: 21/90/100     | A: 31%           | 0.91  | 115    | AA/AG/GG: 9/51/55     | A: 30%           | 0.55     |
|            | Hispanics         | 388          | AA/AG/GG: 52/156/180    | A: 34%           | 0.05  |        |                       |                  |          |
| rs2157719  | Caucasians        | 869          | AA/AG/GG: 314/421/134   | G: 40%           | 0.72  | 548    | AA/AG/GG: 205/266/77  | G: 38%           | 0.53     |
|            | African Americans | 213          | AA/AG/GG: 184/28/1      | G: 7%            | 0.95  | 105    | AA/AG/GG: 88/17/0     | G: 8%            | 0.37     |
|            | Hispanics         | 390          | AA/AG/GG: 217/409/232   | G: 24%           | 0.47  |        |                       |                  |          |
| rs10757274 | Caucasians        | 867          | AA/AG/GG: 214/440/213   | A: 50%           | 0.66  |        |                       |                  |          |
|            | African Americans | 214          | AA/AG/GG: 116/73/25     | A: 71%           | 0.015 |        |                       |                  |          |
|            | Hispanics         | 390          | AA/AG/GG: 115/192/83    | A: 54%           | 0.86  |        |                       |                  |          |
| rs2891168  | Caucasians        | 859          | AA/AG/GG: 214/433/212   | A: 50.1%         | 0.81  |        |                       |                  |          |
|            | African Americans | 211          | AA/AG/GG: 111/78/22     | A: 71%           | 0.14  |        |                       |                  |          |
|            | Hispanics         | 386          | AA/AG/GG: 114/192/80    | A: 54%           | 0.96  |        |                       |                  |          |
| rs1333049  | Caucasians        | 860          | GG/CG/CC: 227/424/209   | C: 49%           | 0.69  |        |                       |                  |          |
|            | African Americans | 212          | GG/CG/CC: 114/73/25     | C: 29%           | 0.02  |        |                       |                  |          |
|            | Hispanics         | 389          | GG/CG/CC: 110/192/87    | C: 47%           | 0.85  |        |                       |                  |          |

\*p<0.0017 (0.05/29), therefore considered deviated from HWE in INFORM African Americans.

## References:

1. Samani NJ, Schunkert H. Chromosome 9p21 and cardiovascular disease: The story unfolds. *Circ Cardiovasc Genet*. 2008;1:81-84
2. Keating BJ, Tischfield S, Murray SS, Bhangale T, Price TS, Glessner JT, Galver L, Barrett JC, Grant SF, Farlow DN, Chandrupatla HR, Hansen M, Ajmal S, Papanicolaou GJ, Guo Y, Li M, Derohannessian S, de Bakker PI, Bailey SD, Montpetit A, Edmondson AC, Taylor K, Gai X, Wang SS, Fornage M, Shaikh T, Groop L, Boehnke M, Hall AS, Hattersley AT, Frackelton E, Patterson N, Chiang CW, Kim CE, Fabsitz RR, Ouwehand W, Price AL, Munroe P, Caulfield M, Drake T, Boerwinkle E, Reich D, Whitehead AS, Cappola TP, Samani NJ, Lusk AJ, Schadt E, Wilson JG, Koenig W, McCarthy MI, Kathiresan S, Gabriel SB, Hakonarson H, Anand SS, Reilly M, Engert JC, Nickerson DA, Rader DJ, Hirschhorn JN, Fitzgerald GA. Concept, design and implementation of a cardiovascular gene-centric 50 k snp array for large-scale genomic association studies. *PLoS One*. 2008;3:e3583
3. Langaee T, Ronaghi M. Genetic variation analyses by pyrosequencing. *Mutat Res*. 2005;573:96-102
